# Supplementary material
Source: PubMed Central journal article supplement (PMC6547158)
Supplement: jamainternmed-179-796-s001.pdf [file jamainternmed-179-796-s001.pdf]

## Supplementary Online Content

da Silva Selistre L, Rech DL, deSouza V, Iwaz J, Lemoine S, Dubourg L. Diagnostic performance of creatinine-based equations for estimating glomerular filtration rate in adults 65 years and older. *JAMA Intern Med*. Published online April 29, 2019. doi:10.1001/jamainternmed.2019.0223

**eTable 1.** Median Bias and P<sub>30</sub> Comparisons Between GFR-Estimating Equations

**eTable 2.** Bias, Precision, and Accuracy of the Four GFR-Estimating Equations According to Measured GFR

**eTable 3.** Performance Criteria of the Four GFR-Estimating Equations in 466 Obese Patients (BMI ≥30 kg/m<sup>2</sup>)

**eTable 4.** Performance Criteria of the Four GFR-Estimating Equations in 311 Kidney Transplanted Patients

**eTable 5.** Performance Criteria of the Four GFR-Estimating Equations According to Categories of Albuminuria

**eTable 6.** Performance Criteria of the Four GFR-Estimating Equations According to Renal Function

**eFigure.** ROC Curve Analysis of Diagnostic Accuracy of Calculated Clearance From the CKD-EPI, LMR, FAS and BIS 1 Equations

This supplementary material has been provided by the authors to give readers additional information about their work.

eTable 1\* Median Bias and P<sub>30</sub> Comparisons Between GFR-Estimating Equations.

| Categories and pairwise comparisons                                       | Difference in median bias (95% CI) | P value | Difference in median P <sub>30</sub> (95% CI) | P value |
|---------------------------------------------------------------------------|------------------------------------|---------|-----------------------------------------------|---------|
| <i>Measured GFR &lt;45 mL/min/1.73 m<sup>2</sup> (N=991)<sup>a</sup></i>  |                                    |         |                                               |         |
| Patients aged 65-74 years (N=670) <sup>b</sup>                            |                                    |         |                                               |         |
| CKD-EPI - LMR                                                             | -3.0 (2.5, -3.5)                   | .08     | -5.0 (-9.5; 0.0)                              | .08     |
| CKD-EPI - FAS                                                             | 0.0 (-0.5; 0.0)                    | .50     | -2.0 (-0.5; 3.0)                              | .48     |
| CKD-EPI - BIS 1                                                           | 3.0 (3.0; 3.5)                     | .003    | 8.0 (-3.0; 13.0)                              | .004    |
| Patients aged ≥75 years (N=321) <sup>c</sup>                              |                                    |         |                                               |         |
| CKD-EPI - LMR                                                             | -4.0 (-4.5, -3.5)                  | <.001   | -5.5 (-12.0; 1.5)                             | .30     |
| CKD-EPI - FAS                                                             | -1.0 (-1.5; -0.5)                  | .04     | 2.5 (-0.5; 9.5)                               | .40     |
| CKD-EPI - BIS 1                                                           | 1.0 (0.5; 1.5)                     | .14     | -0.5 (-11.0; 3.0)                             | .65     |
| <i>Measured GFR ≥45 mL/min/1.73 m<sup>2</sup> (N=1,256)<sup>d</sup></i>   |                                    |         |                                               |         |
| Patients aged 65-74 years (N=1,040) <sup>e</sup>                          |                                    |         |                                               |         |
| CKD-EPI - LMR                                                             | -5.0 (-6.5, -4.5)                  | <.001   | -3.5 (-6.0; 0.0)                              | .08     |
| CKD-EPI - FAS                                                             | -4.0 (-4.5; -3.0)                  | <.001   | -3.0 (-3.0; -2.0)                             | .19     |
| CKD-EPI - BIS 1                                                           | -5.0 (-6.0, -4.5)                  | <.001   | -5.0 (-8.0; -0.5)                             | .001    |
| Patients aged ≥75 years (N=216) <sup>f</sup>                              |                                    |         |                                               |         |
| CKD-EPI - LMR                                                             | -5.0 (-5.0, -4.5)                  | <.001   | 0.0 (0.0; 0.0)                                | 1.00    |
| CKD-EPI - FAS                                                             | -6.0 (-6.5; -4.5)                  | <.001   | 1.5 (0.0; 1.5)                                | .80     |
| CKD-EPI - BIS 1                                                           | -6.0 (-6.5; -4.5)                  | <.001   | -2.0 (-2.0; 0.0)                              | .80     |
| <i>Measured GFR &lt;60mL/min/1.73 m<sup>2</sup> (N=1,560)<sup>g</sup></i> |                                    |         |                                               |         |
| Patients aged 65-74 years (N=1,108) <sup>h</sup>                          |                                    |         |                                               |         |
| CKD-EPI - LMR                                                             | -3.0 (-3.0, -3.0)                  | <.001   | -5.0 (-5.0; -4.5)                             | .07     |
| CKD-EPI - FAS                                                             | -1.0 (-1.0; 0.0)                   | .009    | -4.0 (-4.0; -3.5)                             | .01     |
| CKD-EPI - BIS 1                                                           | 1.0 (0.0; 1.0)                     | .009    | 1.5 (1.5; 2.0)                                | .42     |
| Patients aged ≥75 years (N=452) <sup>i</sup>                              |                                    |         |                                               |         |
| CKD-EPI - LMR                                                             | -3.0 (-4.5, -3.5)                  | .32     | -4.5 (-5.0; 4.0)                              | .32     |
| CKD-EPI - FAS                                                             | -2.0 (-2.0; -1.5)                  | .32     | -4.0 (-3.5; 4.5)                              | .32     |
| CKD-EPI - BIS 1                                                           | -0.5 (-1.5; 0.5)                   | .95     | 0.0 (0.0; 0.0)                                | .94     |

\* Continued on the next page.

eTable 1 (continued) – Median bias and P<sub>30</sub> comparisons between GFR-estimating equations.

| Categories and pairwise comparisons                                    | Difference in median bias (95% CI) | P value | Difference in median P <sub>30</sub> (95% CI) | P value |
|------------------------------------------------------------------------|------------------------------------|---------|-----------------------------------------------|---------|
| <i>Measured GFR ≥60 mL/min/1.73 m<sup>2</sup> (N= 687)<sup>j</sup></i> |                                    |         |                                               |         |
| Patients aged 65-74 years (N=602) <sup>k</sup>                         |                                    |         |                                               |         |
| CKD-EPI - LMR                                                          | -7.0 (-8.0, -6.5)                  | <.001   | -2.0 (-5.0; 2.0)                              | .49     |
| CKD-EPI - FAS                                                          | -6.0 (-6.0; -5.5)                  | <.001   | 0.0 (-3.0; -4.5)                              | .86     |
| CKD-EPI - BIS 1                                                        | -6.0 (-6.7, -5.5)                  | <.001   | -2.0 (-5.5; 1.5)                              | .49     |
| Patients aged 65-74 years (N=85) <sup>l</sup>                          |                                    |         |                                               |         |
| CKD-EPI - LMR                                                          | -5.0 (-5.0, -4.5)                  | <.001   | 5.0 (-0.5; 12.0)                              | .82     |
| CKD-EPI - FAS                                                          | -6.0 (-6.5; -4.5)                  | <.001   | 8.0 (0.0; 16.5)                               | .66     |
| CKD-EPI - BIS 1                                                        | -6.0 (-6.5; -4.5)                  | <.001   | 6.0 (0.0; 14.0)                               | .72     |
| Categories of albuminuria                                              |                                    |         |                                               |         |
| UACR <30 mg/g (N=940) <sup>m</sup>                                     |                                    |         |                                               |         |
| CKD-EPI - LMR                                                          | -4.0 (-4.0, -3.5)                  | <.001   | -4.5 (-8.0; 0.0)                              | .06     |
| CKD-EPI - FAS                                                          | -4.0 (-4.5, -3.0)                  | <.001   | -3.0 (-6.5; 5.0)                              | .25     |
| CKD-EPI - BIS 1                                                        | -3.0 (-4.0; -2.0)                  | <.001   | -2.0 (-10.5; 7.0)                             | .45     |
| UACR 30 to 300 mg/g (N=827) <sup>n</sup>                               |                                    |         |                                               |         |
| CKD-EPI - LMR                                                          | -4.0 (-4.0, -3.5)                  | <.001   | -2.0 (-6.0; 2.0)                              | .62     |
| CKD-EPI - FAS                                                          | -2.0 (-2.0; -1.5)                  | .006    | -2.5 (-6.5; 1.5)                              | .62     |
| CKD-EPI - BIS 1                                                        | -1.0 (-2.5; -0.5)                  | .12     | -3.5 (-4.5; -3.5)                             | .84     |
| UACR >300 mg/g (N=480) <sup>o</sup>                                    |                                    |         |                                               |         |
| CKD-EPI - LMR                                                          | -3.5 (-4.5, -2.5)                  | <.001   | -5.0 (-9.5; 0.0)                              | <.001   |
| CKD-EPI - FAS                                                          | -1.0 (-2.5; -0.5)                  | .05     | 0.0 (-4.5; 5.0)                               | .88     |
| CKD-EPI - BIS 1                                                        | 2.0 (1.5, 3.0)                     | .23     | 6.5 (1.5; 12.0)                               | .05     |
| Obese patients (N=466) <sup>p</sup>                                    |                                    |         |                                               |         |
| CKD-EPI - LMR                                                          | -3.0 (-3.5, -2.0)                  | <.001   | -3.0 (-8.0; 2.5)                              | .46     |
| CKD-EPI - FAS                                                          | -2.0 (-3.5, -1.5)                  | .022    | -1.5 (-7.0; 4.0)                              | .64     |
| CKD-EPI - BIS 1                                                        | 0.0 (-1.0, 1.0)                    | .99     | 4.0 (-1.5; 9.0)                               | .27     |
| Transplanted patients (N=311) <sup>q</sup>                             |                                    |         |                                               |         |
| CKD-EPI - LMR                                                          | -3.0 (-3.5, -1.5)                  | <.001   | -3.5 (-10.0; 3.0)                             | .55     |
| CKD-EPI - FAS                                                          | -2.0 (-2.5, -1.5)                  | .005    | -3.0 (-9.0; 3.5)                              | .54     |
| CKD-EPI - BIS 1                                                        | 0.0 (-0.5, 1.5)                    | .25     | 0.0 (-5.5; 7.5)                               | .55     |

Abbreviations: GFR, glomerular filtration rate; CKD-EPI, Chronic Kidney Disease Epidemiology Collaboration equation; LMR, Lund-Malmö Revised equation; FAS, Full Age Spectrum equation; BIS 1, Berlin Initiative Study 1 equation; UACR, Urinary albumin creatinine ratio; CI, confidence interval.

<sup>a-q</sup> Mean (±SD) measured GFR in mL/min/1.73 m<sup>2</sup>: <sup>a</sup> 30.5 ± 9.0; <sup>b</sup> 32.0 ± 9.0; <sup>c</sup> 28.5 ± 9.0; <sup>d</sup> 64.0 ± 15.5; <sup>e</sup> 52.0 ± 21.0; <sup>f</sup> 41.0 ± 19.0; <sup>g</sup> 38.5 ± 12.5; <sup>h</sup> 39.5 ± 12.5; <sup>i</sup> 35.0 ± 13.0; <sup>j</sup> 74.5 ± 13.0; <sup>k</sup> 75.0 ± 13.5; <sup>l</sup> 72.5 ± 12.0; <sup>m</sup> 57.5 ± 20.5; <sup>n</sup> 46.0 ± 19.5; <sup>o</sup> 39.0 ± 19.5; <sup>p</sup> 44.5 ± 21.7; <sup>q</sup> 47.0 ± 17.0.

eTable 2 - Bias, precision, and accuracy of the four GFR-estimating equations according to measured GFR.

| Categories and criteria                                                   | CKD-EPI              | LMR                  | FAS                  | BIS 1                |
|---------------------------------------------------------------------------|----------------------|----------------------|----------------------|----------------------|
| <i>Measured GFR &lt;45 mL/min/1.73 m<sup>2</sup> (N=991) <sup>a</sup></i> |                      |                      |                      |                      |
| Patients aged 65-74 years (N=670) <sup>b</sup>                            |                      |                      |                      |                      |
| Median bias (95% CI)                                                      | -4.0 (-5.0; -3.0)    | -1.0 (-2.5; 0.5)     | -4.0 (-4.5; -2.5)    | -7.0 (-8.0; -6.0)    |
| IQR (95% CI)                                                              | 11.0 (9.0; 12.0)     | 11.0 (9.0; 12.5)     | 10.0 (8.5;11.0)      | 10.0 (9.0; 11.0)     |
| P <sub>30</sub> (95% CI)                                                  | 67.0 (64.0; 70.5)    | 72.0 (69.0; 76.0)    | 69.0 (65.5;72.5)     | 59.0 (55.0; 63.0)    |
| RMSE (95% CI)                                                             | 0.227 (0.174; 0.282) | 0.260 (0.207; 0.315) | 0.214 (0.162; 0.269) | 0.186 (0.134; 0.242) |
| CCC (95% CI)                                                              | 0.708 (0.672; 0.742) | 0.738 (0.703; 0.770) | 0.688 (0.649; 0.723) | 0.597 (0.557; 0.634) |
| Patients aged ≥75 years (N=321) <sup>c</sup>                              |                      |                      |                      |                      |
| Median bias(95% CI)                                                       | -4.0 (-5.0; -3.0)    | -1.0 (-2.5; -0.5)    | -3.0 (-4.0;-2.0)     | -5.0 (-6.0;-4.0)     |
| IQR (95% CI)                                                              | 11.0 (10.0; 13.0)    | 10.0 (8.5; 12.0)     | 9.0 (7.5; 10.5)      | 8.0 (6.0; 9.5)       |
| P <sub>30</sub> (95% CI)                                                  | 69.0 (64.5; 74.0)    | 74.5 (70.0; 79.5)    | 69.0 (65.5; 72.0)    | 73.0 (68.0; 78.0)    |
| RMSE (95% CI)                                                             | 0.227 (0.164; 0.293) | 0.226 (0.163; 0.292) | 0.202 (0.140; 0.269) | 0.178 (0.116; 0.246) |
| CCC (95% CI)                                                              | 0.734 (0.683; 0.777) | 0.772 (0.724; 0.812) | 0.735 (0.684; 0.778) | 0.652 (0.598; 0.700) |
| <i>Measured GFR ≥45 mL/min/1.73 m<sup>2</sup> (N=1,256) <sup>d</sup></i>  |                      |                      |                      |                      |
| Patients aged 65-74 years (N=1,040) <sup>e</sup>                          |                      |                      |                      |                      |
| Median bias(95% CI)                                                       | -1.0 (-2.5; 0.0)     | 4.0 (3.0; 4.5)       | 4.0 (3.0; 5.0)       | 4.0 (3.5; 5.5)       |
| IQR (95% CI)                                                              | 16.0 (15.0; 17.5)    | 14.0 (12.0; 15.0)    | 13.0 (12.0; 15.0)    | 14.0 (13.0; 15.5)    |
| P <sub>30</sub> (95% CI)                                                  | 85.0 (83.0; 87.0)    | 88.5 (86.5; 90.5)    | 88.0 (86.0; 90.0)    | 90.0 (88.0; 92.0)    |
| RMSE (95% CI)                                                             | 0.206 (0.164; 0.251) | 0.193 (0.151; 0.237) | 0.197 (0.155; 0.241) | 0.172 (0.130; 0.217) |
| CCC (95% CI)                                                              | 0.626 (0.589; 0.661) | 0.605 (0.567; 0.640) | 0.630 (0.594; 0.664) | 0.641 (0.604; 0.674) |
| Patients aged ≥75 years (N=216) <sup>f</sup>                              |                      |                      |                      |                      |
| Median bias(95% CI)                                                       | 1.0 (-1.0; 2.5)      | 7.0 (6.0; 8.5)       | 7.0 (5.0; 8.0)       | 7.0 (5.5; 8.5)       |
| IQR (95% CI)                                                              | 15.0 (12.5; 17.5)    | 14.0 (12.0; 16.5)    | 13.0 (10.0; 15.0)    | 13.0 (11.0; 16.0)    |
| P <sub>30</sub> (95% CI)                                                  | 88.0 (84.0; 92.0)    | 88.0 (84.0; 92.0)    | 86.5 (82.5; 92.0)    | 90.0 (88.0; 92.0)    |
| RMSE (95% CI)                                                             | 0.206 (0.115; 0.307) | 0.192 (0.101; 0.294) | 0.191 (0.100; 0.292) | 0.165 (0.074; 0.268) |
| CCC (95% CI)                                                              | 0.578 (0.487; 0.657) | 0.503 (0.412; 0.585) | 0.490 (0.399; 0.570) | 0.497 (0.407; 0.578) |

Abbreviations: GFR, glomerular filtration rate; CKD-EPI, Chronic Kidney Disease Epidemiology Collaboration equation; LMR, Lund-Malmö Revised equation; FAS, Full Age Spectrum equation; BIS 1, Berlin Initiative Study 1 equation; CI, confidence interval; IQR, interquartile range; RMSE, Root mean square error;

CCC, Concordance correlation coefficient. <sup>a-f</sup> Mean ( $\pm$ SD) measured GFR in mL/min/1.73 m<sup>2</sup>: <sup>a</sup> 30.5  $\pm$  9.0; <sup>b</sup> 32.0  $\pm$  9.0 ; <sup>c</sup> 28.5  $\pm$  9.0 ; <sup>d</sup> 64.0  $\pm$  15.5; <sup>e</sup> 65.0  $\pm$  15.5 ; <sup>f</sup> 59.0  $\pm$  13.0.

eTable 3. Performance Criteria of the Four GFR-Estimating Equations in 466 Obese Patients (BMI  $\geq$ 30 kg/m<sup>2</sup>)<sup>a</sup>.

| Performance criterion    | CKD-EPI              | LMR                  | FAS                  | BIS 1                |
|--------------------------|----------------------|----------------------|----------------------|----------------------|
| Median bias (95% CI)     | -2.0 (-3.5; -0.5)    | -3.0 (-4.5; -1.5)    | -1.0 (-2.0; 0.5)     | 2.0 (-0.5; 1.5)      |
| IQR (95% CI)             | 13.0 (11.0; 14.0)    | 13.0 (11.0; 14.5)    | 14.0 (13.0; 16.0)    | 13.0 (11.0; 14.5)    |
| P <sub>30</sub> (95% CI) | 77.5 (74.0; 81.0)    | 82.0 (79.0; 86.0)    | 79.0 (75.0; 83.0)    | 73.5 (69.5; 77.0)    |
| RMSE (95% CI)            | 0.227 (0.164; 0.293) | 0.226 (0.163; 0.292) | 0.202 (0.140; 0.269) | 0.178 (0.116; 0.246) |
| CCC (95% CI)             | 0.868 (0.845; 0.889) | 0.879 (0.857; 0.898) | 0.864 (0.840; 0.884) | 0.825 (0.799; 0.849) |
| AUC (95% CI)             | 0.918 (0.894; 0.941) | 0.918 (0.895; 0.942) | 0.916 (0.892; 0.940) | 0.917 (0.892; 0.940) |

Abbreviations: GFR, glomerular filtration rate; BMI, body mass index; CKD-EPI, Chronic Kidney Disease Epidemiology Collaboration equation; LMR, Lund-Malmö Revised equation; FAS, Full Age Spectrum equation; BIS 1, Berlin Initiative Study 1 equation; CI, confidence interval; IQR, interquartile range; P<sub>30</sub>, percentage of estimated GFRs that lay within range [measured GFR - 30% of measured GFR; measured GFR + 30% of measured GFR]; RMSE, root mean square error; CCC, Concordance correlation coefficient; AUC, area under the receiver operating characteristic curve. <sup>a</sup> Mean ( $\pm$  SD) of measured GFR = 44.5  $\pm$  21.7 mL/min/1.73 m<sup>2</sup>

eTable 4. Performance Criteria of the Four GFR-Estimating Equations in 311 Kidney Transplanted Patients<sup>a</sup>.

| Performance criterion    | CKD-EPI              | LMR                  | FAS                  | BIS 1                |
|--------------------------|----------------------|----------------------|----------------------|----------------------|
| Median bias (95% CI)     | -5.0 (-7.0; -3.0)    | -1.0 (-2.5; 0.0)     | -2.0 (-2.5; -0.5)    | -4.0 (-5.0; -3.0)    |
| IQR (95% CI)             | 13.5 (11.5; 15.5)    | 12.0 (9.5; 13.5)     | 11.0 (9.5; 12.5)     | 11.0 (8.8; 12.5)     |
| P <sub>30</sub> (95% CI) | 78.5 (74.0; 83.0)    | 82.0 (78.0; 86.0)    | 81.5 (77.0; 86.0)    | 77.5 (72.7; 83.7)    |
| RMSE (95% CI)            | 0.246 (0.169; 0.328) | 0.232 (0.155; 0.314) | 0.224 (0.148; 0.307) | 0.238 (0.162; 0.320) |
| CCC (95% CI)             | 0.777 (0.827; 0.838) | 0.796 (0.752; 0.834) | 0.781 (0.736; 0.819) | 0.732 (0.685; 0.774) |
| AUC (95% CI)             | 0.893 (0.857; 0.927) | 0.893 (0.857; 0.927) | 0.886 (0.850; 0.923) | 0.890 (0.850; 0.925) |

Abbreviations: GFR, glomerular filtration rate; CKD-EPI, Chronic Kidney Disease Epidemiology Collaboration equation; LMR, Lund-Malmö Revised equation; FAS, Full Age Spectrum equation; BIS 1, Berlin Initiative Study 1 equation; CI, confidence interval; IQR, interquartile range; P<sub>30</sub>, percentage of estimated GFRs that lay within range [measured GFR - 30% of measured GFR; measured GFR + 30% of measured GFR]; RMSE, root mean square error; CCC, Concordance correlation coefficient; AUC, area under the receiver operating characteristic curve. <sup>a</sup> Mean (± SD) of measured GFR = 47.0 ± 17.0 mL/min/1.73 m<sup>2</sup>)

eTable 5. Performance Criteria of the Four GFR-Estimating Equations According to Categories of Albuminuria.

| Categories and criteria                        | CKD-EPI              | LMR                  | FAS                  | BIS 1                |
|------------------------------------------------|----------------------|----------------------|----------------------|----------------------|
| <i>UACR &lt;30 mg/g (N=940)<sup>a</sup></i>    |                      |                      |                      |                      |
| Median bias(95% CI)                            | -2.0 (-3.0; -1.0)    | 3.0 (2.5; 4.5)       | 2.0 (1.0; 3.5)       | 1.0 (0.0; 2.0)       |
| IQR (95% CI)                                   | 15.0 (13.0; 16.5)    | 15.0 (13.0; 17.0)    | 15.0 (13.5; 17.0)    | 15.0 (13.0; 16.5)    |
| P <sub>30</sub> (95% CI)                       | 80.5 (78.0; 83.0)    | 85.0 (82.5; 87.0)    | 83.5 (81.0; 85.5)    | 82.0 (80.0; 85.0)    |
| RMSE (95% CI)                                  | 0.204 (0.160; 0.250) | 0.199 (0.155; 0.245) | 0.168 (0.124; 0.215) | 0.198 (0.155; 0.245) |
| CCC (95% CI)                                   | 0.811 (0.788; 0.831) | 0.822 (0.800; 0.841) | 0.806 (0.783; 0.826) | 0.785 (0.762; 0.806) |
| AUC (95% CI)                                   | 0.896 (0.873; 0.919) | 0.895 (0.872; 0.918) | 0.893 (0.869; 0.916) | 0.894 (0.870; 0.917) |
| <i>UACR 30 to 300 mg/g (N=827)<sup>b</sup></i> |                      |                      |                      |                      |
| Median bias(95% CI)                            | -3.0 (-4.0; -2.0)    | 1.0 (-0.5; 1.5)      | -1.0 (-2.0; 0.0)     | -3.0 (-5.0; -2.0)    |
| IQR (95% CI)                                   | 14.5 (13.0; 15.5)    | 14.0 (13.0; 15.5)    | 14.0 (13.0; 15.5)    | 14.0 (12.0; 15.0)    |
| P <sub>30</sub> (95% CI)                       | 76.0 (73.0; 79.0)    | 78.0 (75.5; 81.0)    | 78.5 (76.0; 81.5)    | 76.5 (74.0; 79.5)    |
| RMSE (95% CI)                                  | 0.239 (0.192; 0.288) | 0.238 (0.191; 0.288) | 0.215 (0.168; 0.265) | 0.189 (0.142; 0.239) |
| CCC (95% CI)                                   | 0.830 (0.808; 0.850) | 0.841 (0.820; 0.860) | 0.823 (0.800; 0.843) | 0.788 (0.764; 0.810) |
| AUC (95% CI)                                   | 0.899 (0.879; 0.919) | 0.901 (0.882; 0.921) | 0.894 (0.874; 0.915) | 0.894 (0.874; 0.915) |
| <i>UACR &gt;300 mg/g (N=480)<sup>c</sup></i>   |                      |                      |                      |                      |
| Median bias(95% CI)                            | -2.0 (-3.0; -0.5)    | 1.0 (0.0; 2.0)       | -2.0 (-3.5; -1.0)    | -3.0 (-4.0; -1.0)    |
| IQR (95% CI)                                   | 11.0 (9.5; 12.0)     | 11.0 (10.0; 12.5)    | 10.0 (8.5; 11.5)     | 11.0 (9.5; 12.5)     |
| P <sub>30</sub> (95% CI)                       | 76.0 (72.0; 79.5)    | 80.5 (77.0; 84.5)    | 75.5 (71.5; 79.0)    | 69.0 (65.5; 73.5)    |
| RMSE (95% CI)                                  | 0.234 (0.175; 0.302) | 0.235 (0.174; 0.301) | 0.208 (0.146; 0.274) | 0.182 (0.121; 0.249) |
| CCC (95% CI)                                   | 0.879 (0.857; 0.898) | 0.887 (0.866; 0.904) | 0.863 (0.840; 0.883) | 0.817 (0.790; 0.840) |
| AUC (95% CI)                                   | 0.952 (0.934; 0.970) | 0.951 (0.933; 0.968) | 0.949 (0.931; 0.967) | 0.951 (0.933; 0.968) |

Abbreviations: GFR, glomerular filtration rate; CKD-EPI, Chronic Kidney Disease Epidemiology Collaboration equation; LMR, Lund-Malmö Revised equation; FAS, Full Age Spectrum equation; BIS 1, Berlin Initiative Study 1 equation; UACR, Urinary albumin creatinine ratio. CI, confidence interval; IQR, interquartile range; P<sub>30</sub>, percentage of estimated GFRs that lay within range [measured GFR - 30% of measured GFR; measured GFR + 30% of measured GFR]; RMSE, root mean square error; CCC, Concordance correlation coefficient; AUC, area under the receiver operating characteristic curve. <sup>a-c</sup> Mean (± SD) of measured GFR in mL/min/1.73 m<sup>2</sup>: <sup>a</sup> 57.5 ± 20.5; <sup>b</sup> 46.0 ± 19.5; <sup>c</sup> 39.0 ± 19.5.



eTable 6. Performance Criteria of the Four GFR-Estimating Equations According to Renal Function.

| Categories and criteria                                                    | CKD-EPI              | LMR                  | FAS                  | BIS 1                |
|----------------------------------------------------------------------------|----------------------|----------------------|----------------------|----------------------|
| <i>Measured GFR &lt;60 mL/min/1.73 m<sup>2</sup> (N=1,560)<sup>a</sup></i> |                      |                      |                      |                      |
| Patients aged 65-74 years (N=1,108) <sup>b</sup>                           |                      |                      |                      |                      |
| Median bias (95% CI)                                                       | -4.0 (-5.5; -3.5)    | -1.0 (-2.5; -0.5)    | -3.0 (-4.0; -2.5)    | -5.0 (-5.5; -4.5)    |
| IQR (95% CI)                                                               | 13.0 (11.0; 14.5)    | 12.0 (11.0; 13.0)    | 12.0 (11.0; 13.5)    | 12.0 (11.5; 13.5)    |
| P <sub>30</sub> (95% CI)                                                   | 73.0 (70.5; 76.0)    | 78.0 (75.5; 80.5)    | 77.0 (74.5; 79.5)    | 71.5 (69.0; 74.0)    |
| RMSE (95% CI)                                                              | 0.240 (0.199; 0.282) | 0.240 (0.199; 0.283) | 0.204 (0.163; 0.247) | 0.178 (0.137; 0.221) |
| CCC (95% CI)                                                               | 0.778 (0.754; 0.799) | 0.808 (0.787; 0.827) | 0.774 (0.750; 0.796) | 0.716 (0.690; 0.740) |
| Patients aged ≥75 years (N=452) <sup>c</sup>                               |                      |                      |                      |                      |
| Median bias (95% CI)                                                       | -3.0 (-3.5; -1.5)    | 0.0 (-1.5; 1.0)      | -1.0 (-1.5; 0.0)     | -3.0 (-4.0; -2.0)    |
| IQR (95% CI)                                                               | 12.0 (11.0; 14.0)    | 11.0 (9.5; 13.0)     | 10.0 (8.0; 11.5)     | 11.0 (10.0; 13.0)    |
| P <sub>30</sub> (95% CI)                                                   | 74.0 (70.0; 78.0)    | 78.5 (75.0; 82.0)    | 77.5 (74.0; 81.0)    | 74.0 (70.0; 78.0)    |
| RMSE (95% CI)                                                              | 0.233 (0.170; 0.301) | 0.237 (0.173; 0.305) | 0.201 (0.138; 0.269) | 0.174 (0.111; 0.243) |
| CCC (95% CI)                                                               | 0.805 (0.872; 0.835) | 0.832(0.801; 0.858)  | 0.802 (0.768; 0.831) | 0.753 (0.717; 0.785) |
| <i>Measured GFR ≥60 mL/min/1.73 m<sup>2</sup> (N= 687)<sup>d</sup></i>     |                      |                      |                      |                      |
| Patients aged 65-74 years (N=602) <sup>e</sup>                             |                      |                      |                      |                      |
| Median bias (95% CI)                                                       | 1.0 (0.0; 2.5)       | 8.0 (7.0; 10.0)      | 7.0 (5.5; 8.5)       | 7.0 (5.0; 8.0)       |
| IQR (95% CI)                                                               | 17.0 (15.0; 18.5)    | 13.0 (10.5; 13.5)    | 15.0 (13.0; 17.0)    | 14.0 (12.5; 15.5)    |
| P <sub>30</sub> (95% CI)                                                   | 87.5 (85.0; 90.0)    | 89.5 (87.0; 91.5)    | 87.0 (84.0; 89.5)    | 89.5 (87.0; 92.0)    |
| RMSE (95% CI)                                                              | 0.197 (0.142; 0.256) | 0.182 (0.127; 0.241) | 0.201 (0.146; 0.260) | 0.176 (0.121; 0.235) |
| CCC (95% CI)                                                               | 0.510 (0.454; 0.561) | 0.447 (0.393; 0.497) | 0.485 (0.434; 0.533) | 0.489 (0.436; 0.538) |
| Patients aged 65-74 years (N=85) <sup>f</sup>                              |                      |                      |                      |                      |
| Median bias (95% CI)                                                       | 4.0 (0.5; 7.5)       | 12.0(9.0; 15.5)      | 13.0(9.0; 16.0)      | 14.0(11.5; 17.0)     |
| IQR (95% CI)                                                               | 16.0 (10.5; 21.5)    | 12.0 (7.0; 15.5)     | 13.0 (8.0; 16.0)     | 13.0 (9.0; 17.5)     |
| P <sub>30</sub> (95% CI)                                                   | 92.0 (86.0; 98.0)    | 87.0 (80.0; 94.0)    | 83.5 (75.5; 92.0)    | 86.0 (78.5; 93.0)    |
| RMSE (95% CI)                                                              | 0.174 (0.00; 0.345)  | 0.150 (0.00; 0.325)  | 0.167 (0.00; 0.340)  | 0.146 (0.00; 0.321)  |
| CCC (95% CI)                                                               | 0.416 (0.243; 0.564) | 0.416 (0.243; 0.564) | 0.416 (0.243; 0.564) | 0.416 (0.243; 0.564) |

Abbreviations: GFR, glomerular filtration rate; CKD-EPI, Chronic Kidney Disease Epidemiology Collaboration equation; LMR, Lund-Malmö Revised equation; FAS, Full Age Spectrum equation; BIS 1, Berlin Initiative Study 1 equation; CI, confidence interval; IQR, interquartile range; P<sub>30</sub>, percentage of estimated GFRs that lay within range [measured GFR - 30% of measured GFR; measured GFR + 30% of measured GFR]; RMSE, root mean square error; CCC, Concordance correlation coefficient. <sup>a-f</sup> Mean (± SD) of measured GFR in mL/min/1.73 m<sup>2</sup>: <sup>a</sup> 38.5 ± 12.5; <sup>b</sup> 39.5 ± 12.5; <sup>c</sup> 35.0 ± 13.0; <sup>d</sup> 74.5 ± 13.0; <sup>e</sup> 75.0 ± 13.5; <sup>f</sup> 72.5 ± 12.0.

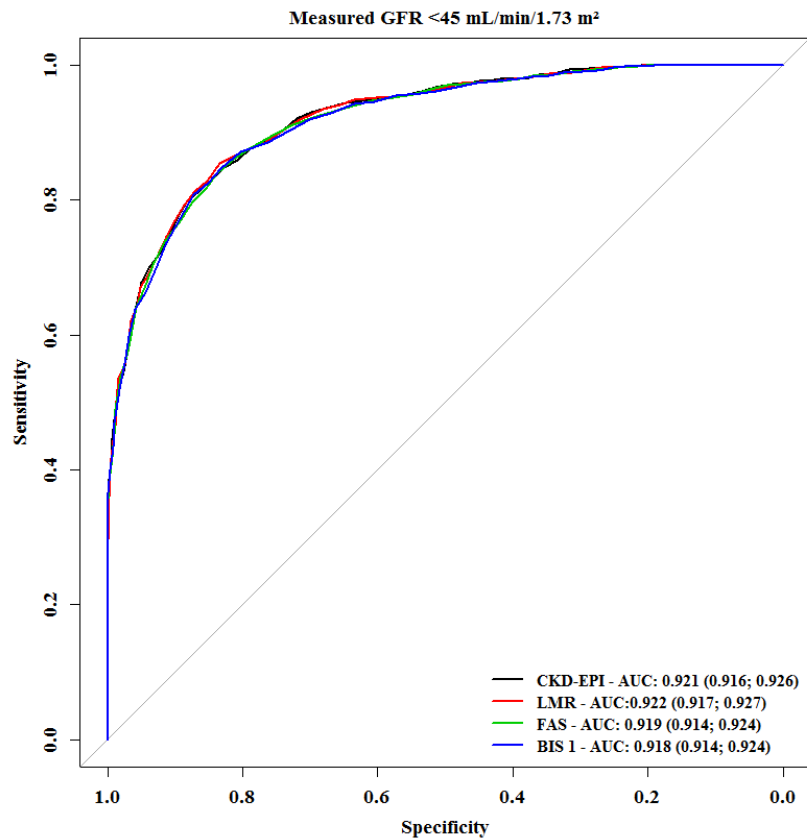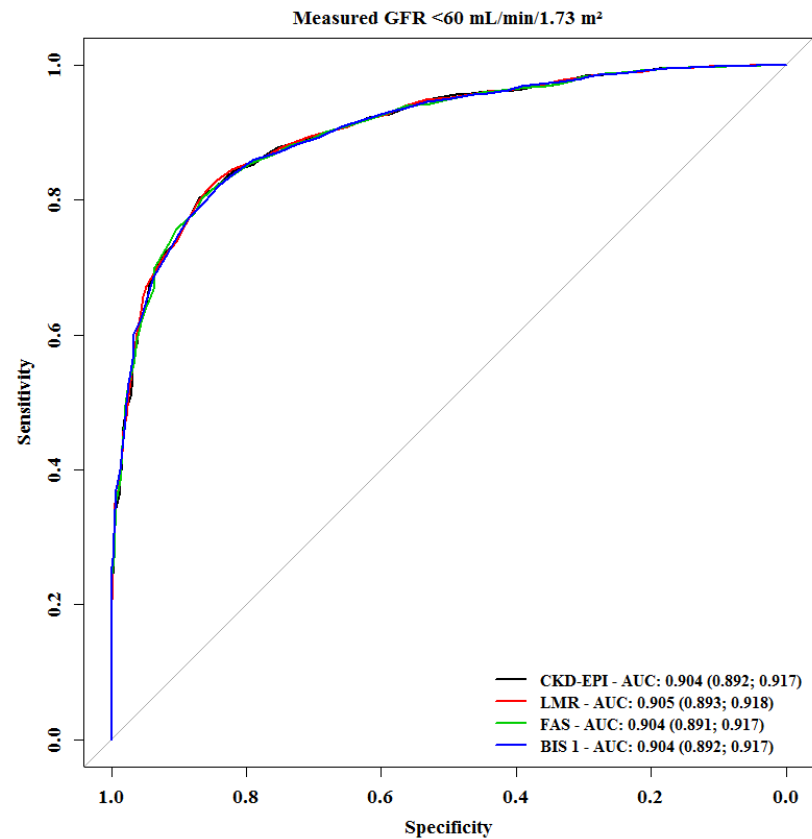

**eFigure. ROC Curve Analysis of Diagnostic Accuracy of Calculated Clearance From the CKD-EPI, LMR, FAS and BIS 1 Equations. The mGFR determined with inulin was used as the reference standard and cut-off value was set at 45 and 60 mL/min/1.73 m<sup>2</sup>. Confidence intervals were calculated by bootstrap methods (2,000 bootstraps) for all ROC. Abbreviations: CKD-EPI, Chronic Kidney Disease Epidemiology Collaboration; LMR, Lund-Malmö Revised; FAS, Full Age Spectrum; BIS 1, Belim Initiative Study 1; GFR, glomerular filtration rate; ROC, Receiver operating characteristic. mGFR, Measured GFR. CI denotes confidence interval.**
